# Supplementary material for: Influence of water on the structure and magnetic properties of a copper bromide coordination compound with 3-amino-4-ethoxycarbonylpyrazole
Source: Royal Society of Chemistry journal article supplement (doi:10.1039/c8nj00017d), 2018-01-01
Supplement: c8nj00017d1.pdf [file c8nj00017d1.pdf]

**Table S1.** Crystallographic data and single-crystal XRD experiment details.

| Structure identifier                                 | <b>2</b>                                                                         | <b>3</b>                                                                          | <b>4</b>                                                                          |
|------------------------------------------------------|----------------------------------------------------------------------------------|-----------------------------------------------------------------------------------|-----------------------------------------------------------------------------------|
| Empirical formula                                    | C <sub>24</sub> H <sub>38</sub> Br <sub>2</sub> CuN <sub>12</sub> O <sub>9</sub> | C <sub>24</sub> H <sub>40</sub> Br <sub>2</sub> CuN <sub>12</sub> O <sub>10</sub> | C <sub>24</sub> H <sub>40</sub> Br <sub>2</sub> CuN <sub>12</sub> O <sub>10</sub> |
| Formula weight, g/mol                                | 862.02                                                                           | 880.04                                                                            | 880.04                                                                            |
| Temperature, K                                       | 150                                                                              | 150                                                                               | 200                                                                               |
| Crystal system, space group                          | monoclinic, <i>Cc</i>                                                            | monoclinic, <i>P2<sub>1</sub>/n</i>                                               | triclinic, <i>P</i> -1                                                            |
| a, Å                                                 | 30.7828(17)                                                                      | 11.262(3)                                                                         | 7.5931(19)                                                                        |
| b, Å                                                 | 5.6317(3)                                                                        | 7.5904(17)                                                                        | 9.5094(19)                                                                        |
| c, Å                                                 | 20.8991(12)                                                                      | 21.555(4)                                                                         | 13.177(3)                                                                         |
| α, °                                                 | 90                                                                               | 90                                                                                | 103.046(8)                                                                        |
| β, °                                                 | 100.075(2)                                                                       | 94.803(7)                                                                         | 106.647(9)                                                                        |
| γ, °                                                 | 90                                                                               | 90                                                                                | 94.822(8)                                                                         |
| Volume, Å <sup>3</sup>                               | 3567.2(3)                                                                        | 1836.0(7)                                                                         | 876.7(4)                                                                          |
| Z / Z'                                               | 4 / 1                                                                            | 2 / ½                                                                             | 1 / ½                                                                             |
| ρ <sub>calc</sub> , g/cm <sup>3</sup>                | 1.605                                                                            | 1.592                                                                             | 1.667                                                                             |
| μ, mm <sup>-1</sup>                                  | 2.916                                                                            | 2.837                                                                             | 2.970                                                                             |
| F(000)                                               | 1748.0                                                                           | 894.0                                                                             | 447.0                                                                             |
| Crystal size, mm <sup>3</sup>                        | 0.55×0.04×0.03                                                                   | 0.28×0.25×0.19                                                                    | 0.10×0.04×0.005                                                                   |
| Radiation                                            | MoKα, λ = 0.71073                                                                |                                                                                   |                                                                                   |
| 2θ range for data collection, °                      | 4.378 to 55.748                                                                  | 3.792 to 61.352                                                                   | 4.454 to 50.05                                                                    |
| Index ranges                                         | -40 ≤ h ≤ 40<br>-6 ≤ k ≤ 7<br>-27 ≤ l ≤ 27                                       | -16 ≤ h ≤ 16<br>-10 ≤ k ≤ 10<br>-28 ≤ l ≤ 30                                      | -9 ≤ h ≤ 9<br>-11 ≤ k ≤ 8<br>-15 ≤ l ≤ 15                                         |
| Reflections collected / independent                  | 27621 / 8500                                                                     | 32014 / 5628                                                                      | 8450 / 3083                                                                       |
| R <sub>int</sub> / R <sub>σ</sub>                    | 0.0389 / 0.0455                                                                  | 0.0374 / 0.0253                                                                   | 0.0769 / 0.1200                                                                   |
| Data / restraints / parameters                       | 8500 / 2 / 438                                                                   | 5628 / 0 / 231                                                                    | 3083 / 0 / 225                                                                    |
| Goodness-of-fit on F <sup>2</sup>                    | 1.028                                                                            | 1.037                                                                             | 0.973                                                                             |
| Final R <sub>1</sub> / wR <sub>2</sub> for I ≥ 2σ(I) | 0.0331 / 0.0754                                                                  | 0.0248 / 0.0575                                                                   | 0.0479 / 0.0751                                                                   |
| Final R <sub>1</sub> / wR <sub>2</sub> for all data  | 0.0497 / 0.0815                                                                  | 0.0317 / 0.0602                                                                   | 0.1019 / 0.0885                                                                   |
| Largest diff. peak/hole, e/Å <sup>3</sup>            | 0.79 / -0.44                                                                     | 0.45 / -0.39                                                                      | 0.47 / -0.52                                                                      |

**Table S2.** Experimental data of bond lengths of **2–4**; bond lengths of **1** and **L** are taken from CCDC.

|     |      | <b>2</b>  | <b>3</b>   | <b>4</b>  | <b>1</b>   | <b>L</b>   |
|-----|------|-----------|------------|-----------|------------|------------|
| Br1 | Cu1  | 2.7804(6) | 2.9383(5)  | 2.9652(9) | 2.4904(4)  |            |
| Br1 | Cu1' | 2.8514(6) |            |           | 3.0447(5)  |            |
| Cu1 | N11  | 2.005(4)  | 2.0003(13) | 2.013(4)  | 1.9625(36) |            |
| Cu1 | N21  | 2.020(4)  | 2.0211(12) | 2.027(4)  |            |            |
| Cu1 | N31  | 2.014(4)  |            |           |            |            |
| Cu1 | N41  | 2.019(4)  |            |           |            |            |
| N11 | N12  | 1.382(6)  | 1.3726(18) | 1.376(5)  | 1.3709(51) | 1.3669(19) |
| N21 | N22  | 1.378(6)  | 1.3772(17) | 1.372(5)  |            |            |
| N31 | N32  | 1.375(6)  |            |           |            |            |
| N41 | N42  | 1.375(6)  |            |           |            |            |
| N11 | C11  | 1.310(7)  | 1.3208(18) | 1.322(6)  | 1.3161(60) | 1.3235(22) |
| N21 | C21  | 1.323(7)  | 1.3235(19) | 1.316(6)  |            |            |
| N31 | C31  | 1.308(7)  |            |           |            |            |
| N41 | C41  | 1.312(7)  |            |           |            |            |
| N12 | C13  | 1.335(7)  | 1.3428(19) | 1.346(6)  | 1.3405(63) | 1.3329(22) |
| N22 | C23  | 1.341(7)  | 1.3520(18) | 1.342(6)  |            |            |
| N32 | C33  | 1.352(7)  |            |           |            |            |
| N42 | C43  | 1.342(7)  |            |           |            |            |
| N13 | C13  | 1.353(7)  | 1.346(2)   | 1.344(6)  | 1.3547(69) | 1.3518(21) |
| N23 | C23  | 1.348(8)  | 1.3486(19) | 1.339(6)  |            |            |
| N33 | C33  | 1.341(7)  |            |           |            |            |
| N43 | C43  | 1.347(7)  |            |           |            |            |
| C11 | C12  | 1.406(8)  | 1.399(2)   | 1.399(7)  | 1.3928(64) | 1.3871(22) |
| C21 | C22  | 1.398(8)  | 1.409(2)   | 1.404(6)  |            |            |
| C31 | C32  | 1.402(8)  |            |           |            |            |
| C41 | C42  | 1.404(8)  |            |           |            |            |
| C12 | C13  | 1.390(8)  | 1.400(2)   | 1.402(7)  | 1.3891(61) | 1.4164(22) |

|     |     |           |            |          |            |            |
|-----|-----|-----------|------------|----------|------------|------------|
| C22 | C23 | 1.396(8)  | 1.399(2)   | 1.384(6) |            |            |
| C32 | C33 | 1.410(8)  |            |          |            |            |
| C42 | C43 | 1.406(8)  |            |          |            |            |
| C12 | C14 | 1.446(9)  | 1.444(2)   | 1.448(7) | 1.4467(63) | 1.4430(24) |
| C22 | C24 | 1.432(9)  | 1.453(2)   | 1.455(6) |            |            |
| C32 | C34 | 1.438(9)  |            |          |            |            |
| C42 | C44 | 1.449(9)  |            |          |            |            |
| C15 | C16 | 1.509(11) | 1.502(2)   | 1.449(8) | 1.4952(93) | 1.4923(25) |
| C25 | C26 | 1.474(11) | 1.503(3)   | 1.500(7) |            |            |
| C35 | C36 | 1.518(10) |            |          |            |            |
| C45 | C46 | 1.509(11) |            |          |            |            |
| O11 | C14 | 1.208(8)  | 1.2198(19) | 1.200(6) | 1.2068(64) | 1.2159(20) |
| O21 | C24 | 1.228(8)  | 1.211(2)   | 1.207(5) |            |            |
| O31 | C34 | 1.239(8)  |            |          |            |            |
| O41 | C44 | 1.223(8)  |            |          |            |            |
| O12 | C14 | 1.354(8)  | 1.3372(19) | 1.360(6) | 1.3451(62) | 1.3364(20) |
| O22 | C24 | 1.343(8)  | 1.3461(19) | 1.329(6) |            |            |
| O32 | C34 | 1.329(8)  |            |          |            |            |
| O42 | C44 | 1.337(8)  |            |          |            |            |
| O12 | C15 | 1.455(7)  | 1.4512(17) | 1.456(6) | 1.4512(62) | 1.4509(22) |
| O22 | C25 | 1.484(8)  | 1.447(2)   | 1.454(6) |            |            |
| O32 | C35 | 1.441(7)  |            |          |            |            |
| O42 | C45 | 1.445(8)  |            |          |            |            |

<sup>a</sup> -x, -y, -z for **1** and -x, 1-y, 1-z for L

**Table S3.** Experimental data of valence angles of **2–4**; valence angles of **1** and L are taken from CCDC.

|     |     |                  | <b>2</b>   | <b>3</b>   | <b>4</b>  | <b>1</b>     | L          |
|-----|-----|------------------|------------|------------|-----------|--------------|------------|
| Cu1 | Br1 | Cu1 <sup>1</sup> | 179.52(3)  |            |           |              |            |
| Br1 | Cu1 | Br1 <sup>2</sup> | 179.52(3)  | 180        | 180       |              |            |
| N11 | Cu1 | Br1              | 91.70(12)  | 91.41(4)   | 88.54(13) |              |            |
| N21 | Cu1 | Br1              | 89.93(12)  | 90.96(4)   | 89.99(13) |              |            |
| N31 | Cu1 | Br1              | 93.16(12)  | 88.59(4)   | 91.46(13) |              |            |
| N41 | Cu1 | Br1              | 88.79(12)  | 89.04(4)   | 90.01(13) |              |            |
| N11 | Cu1 | Br1 <sup>2</sup> | 87.84(12)  |            |           |              |            |
| N21 | Cu1 | Br1 <sup>2</sup> | 89.92(13)  |            |           |              |            |
| N31 | Cu1 | Br1 <sup>2</sup> | 87.30(12)  |            |           |              |            |
| N41 | Cu1 | Br1 <sup>2</sup> | 91.36(12)  |            |           |              |            |
| N11 | Cu1 | N21              | 91.10(17)  | 90.40(5)   | 90.42(17) |              |            |
| N11 | Cu1 | N31              | 175.13(12) | 180        | 180       |              |            |
| N11 | Cu1 | N41              | 88.83(18)  | 89.60(5)   | 89.58(16) |              |            |
| N21 | Cu1 | N31              | 89.13(18)  | 89.61(5)   | 89.58(16) |              |            |
| N21 | Cu1 | N41              | 178.71(12) | 180        | 180       |              |            |
| N31 | Cu1 | N41              | 91.05(17)  |            |           |              |            |
| Cu1 | N11 | N12              | 125.2(3)   | 123.05(9)  | 121.8(3)  | 124.705(259) |            |
| Cu1 | N21 | N22              | 123.7(3)   | 119.41(9)  | 119.6(3)  |              |            |
| Cu1 | N31 | N32              | 124.7(3)   |            |           |              |            |
| Cu1 | N41 | N42              | 124.4(3)   |            |           |              |            |
| Cu1 | N11 | C11              | 129.7(4)   | 130.86(10) | 133.0(4)  | 130.090(311) |            |
| Cu1 | N21 | C21              | 130.9(4)   | 135.22(10) | 134.7(3)  |              |            |
| Cu1 | N31 | C31              | 129.2(3)   |            |           |              |            |
| Cu1 | N41 | C41              | 129.7(4)   |            |           |              |            |
| N11 | N12 | C13              | 111.3(4)   | 111.57(12) | 112.4(4)  | 111.3(3)     | 103.96(13) |
| N21 | N22 | C23              | 111.3(4)   | 112.03(12) | 111.2(4)  |              |            |
| N31 | N32 | C33              | 111.5(4)   |            |           |              |            |
| N41 | N42 | C43              | 111.6(4)   |            |           |              |            |
| N12 | N11 | C11              | 104.9(4)   | 105.63(12) | 104.5(4)  | 105.2(3)     | 113.6(1)   |
| N22 | N21 | C21              | 105.2(4)   | 105.37(11) | 105.5(4)  |              |            |
| N32 | N31 | C31              | 106.0(4)   |            |           |              |            |
| N42 | N41 | C41              | 105.9(4)   |            |           |              |            |

|     |     |     |          |            |          |           |            |
|-----|-----|-----|----------|------------|----------|-----------|------------|
| N12 | C13 | C12 | 107.4(5) | 106.48(13) | 106.1(5) | 107.0(4)  | 111.09(14) |
| N22 | C23 | C22 | 107.1(5) | 105.96(13) | 107.1(4) |           |            |
| N32 | C33 | C32 | 105.8(5) |            |          |           |            |
| N42 | C43 | C42 | 106.2(5) |            |          |           |            |
| N11 | C11 | C12 | 112.2(5) | 111.25(13) | 112.2(4) | 111.9(4)  | 106.50(14) |
| N21 | C21 | C22 | 111.7(5) | 111.15(13) | 111.3(4) |           |            |
| N31 | C31 | C32 | 111.6(5) |            |          |           |            |
| N41 | C41 | C42 | 111.3(5) |            |          |           |            |
| C11 | C12 | C13 | 104.1(5) | 105.07(12) | 104.8(5) | 104.6(4)  | 104.79(14) |
| C21 | C22 | C23 | 104.7(5) | 105.49(12) | 104.8(4) |           |            |
| C31 | C32 | C33 | 105.0(5) |            |          |           |            |
| C41 | C42 | C43 | 105.0(5) |            |          |           |            |
| N12 | C13 | N13 | 122.9(6) | 123.55(14) | 124.2(5) | 123.6(4)  | 121.77(14) |
| N22 | C23 | N23 | 122.9(6) | 122.28(14) | 122.4(4) |           |            |
| N33 | C33 | N32 | 124.2(6) |            |          |           |            |
| N42 | C43 | N43 | 124.0(6) |            |          |           |            |
| N13 | C13 | C12 | 129.6(6) | 129.96(14) | 129.7(5) | 129.4(4)  | 127.15(15) |
| N23 | C23 | C22 | 130.0(6) | 131.75(14) | 122.4(4) |           |            |
| N33 | C33 | C32 | 130.0(5) |            |          |           |            |
| N43 | C43 | C42 | 129.7(6) |            |          |           |            |
| C13 | C12 | C14 | 126.0(5) | 124.94(13) | 123.2(5) | 125.76(4) | 126.71(15) |
| C23 | C22 | C24 | 125.0(6) | 125.35(14) | 124.4(4) |           |            |
| C33 | C32 | C34 | 126.0(5) |            |          |           |            |
| C43 | C42 | C44 | 124.1(6) |            |          |           |            |
| C11 | C12 | C14 | 129.9(6) | 129.77(14) | 131.6(5) | 129.6(4)  | 128.44(15) |
| C21 | C22 | C24 | 130.3(6) | 129.15(14) | 130.6(4) |           |            |
| C31 | C32 | C34 | 129.0(6) |            |          |           |            |
| C41 | C42 | C44 | 130.9(6) |            |          |           |            |
| O11 | C14 | O12 | 123.9(6) | 123.56(14) | 124.6(5) | 124.1(5)  | 123.58(15) |
| O21 | C24 | O22 | 123.4(6) | 123.91(14) | 123.8(5) |           |            |
| O31 | C34 | O32 | 123.2(6) |            |          |           |            |
| O41 | C44 | O42 | 122.7(6) |            |          |           |            |
| O11 | C14 | C12 | 125.1(6) | 123.56(14) | 124.3(5) | 124.4(4)  | 123.83(15) |
| O21 | C24 | C22 | 123.6(6) | 124.61(15) | 122.7(5) |           |            |
| O31 | C34 | C32 | 124.0(6) |            |          |           |            |
| O41 | C44 | C42 | 124.3(6) |            |          |           |            |
| O12 | C14 | C12 | 111.0(6) | 112.16(13) | 110.9(5) | 111.6(4)  | 112.58(14) |
| O22 | C24 | C22 | 112.9(6) | 111.48(13) | 113.4(4) |           |            |
| O32 | C34 | C32 | 112.7(6) |            |          |           |            |
| O42 | C44 | C42 | 113.0(6) |            |          |           |            |
| C14 | O12 | C15 | 115.8(5) | 115.99(12) | 114.4(4) | 116.1(4)  | 116.94(13) |
| C24 | O22 | C25 | 115.4(6) | 116.00(13) | 115.8(4) |           |            |
| C34 | O32 | C35 | 117.2(5) |            |          |           |            |
| C44 | O42 | C45 | 115.2(6) |            |          |           |            |
| O12 | C15 | C16 | 105.4(5) | 107.15(13) | 108.1(5) | 106.4(5)  | 106.62(13) |
| O22 | C25 | C26 | 106.8(7) | 106.74(16) | 108.3(4) |           |            |
| O32 | C35 | C36 | 106.2(6) |            |          |           |            |
| O42 | C45 | C46 | 107.1(6) |            |          |           |            |

For **3** and **4** X3n=X1n', X4n=X2n'.

**Table S4.** Experimental data of torsion angles of **2–4**; torsion angles of **1** and **L** are taken from CCDC.

|     |     |     |     | <b>2</b>  | <b>3</b>    | <b>4</b>  | <b>1</b> | <b>L</b>    |
|-----|-----|-----|-----|-----------|-------------|-----------|----------|-------------|
| Br1 | Cu1 | N11 | C11 | 38.7(5)   | 23.65(14)   | -156.2(5) | -68.8(4) |             |
| Br1 | Cu1 | N21 | C21 | -141.5(5) | -173.86(15) | 171.4(5)  |          |             |
| Br1 | Cu1 | N31 | C31 | 41.3(5)   |             |           |          |             |
| Br1 | Cu1 | N41 | C41 | -139.5(5) |             |           |          |             |
| C11 | C12 | C14 | O11 | -175.9(6) | -176.68(16) | -174.9(6) | 177.9(5) | -173.74(17) |
| C21 | C22 | C24 | O21 | -172.6(6) | -175.70(16) | 170.5(6)  |          |             |
| C31 | C32 | C34 | O31 | -179.4(6) |             |           |          |             |

|     |     |     |     |           |             |           |           |             |
|-----|-----|-----|-----|-----------|-------------|-----------|-----------|-------------|
| C41 | C42 | C44 | O41 | -176.1(7) |             |           |           |             |
| C12 | C14 | O12 | C15 | -175.5(5) | 178.90(12)  | -175.0(5) | -179.5(4) | -179.29(13) |
| C22 | C24 | O22 | C25 | -176.5(5) | -179.84(14) | 174.3(5)  |           |             |
| C32 | C34 | O32 | C35 | -177.2(5) |             |           |           |             |
| C42 | C44 | O42 | C45 | -178.7(6) |             |           |           |             |
| C14 | O12 | C15 | C16 | -179.1(5) | 179.27(13)  | -175.8(5) | -178.5(5) | 175.87(14)  |
| C24 | O22 | C25 | C26 | 177.9(6)  | -176.30(15) | -171.2(5) |           |             |
| C34 | O32 | C35 | C36 | -179.2(5) |             |           |           |             |
| C44 | O42 | C45 | C46 | 175.7(6)  |             |           |           |             |

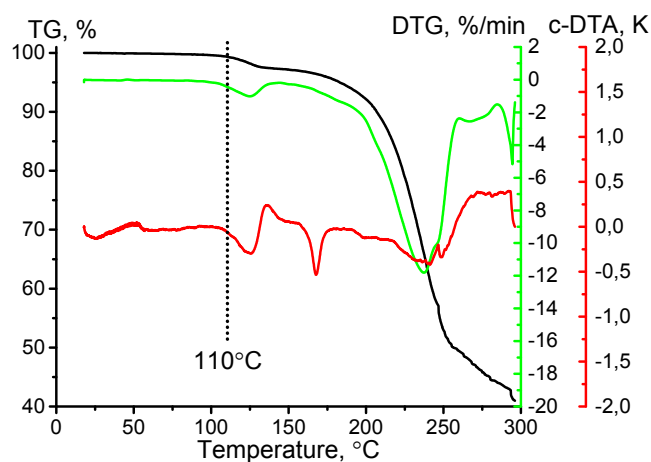

**Fig. S1.** TG, DTG and c-DTA curves of polycrystalline **2**.

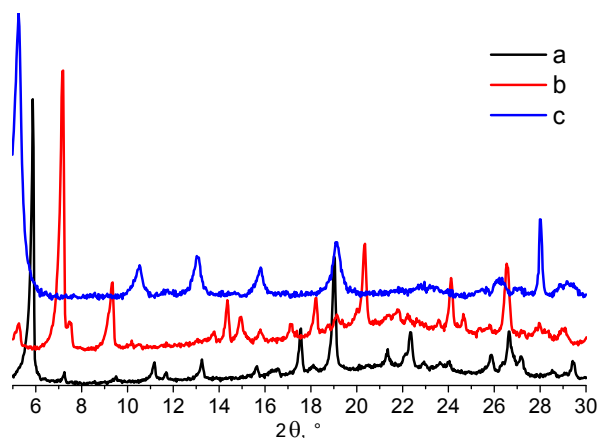

**Fig. S2.** XRD spectra at 300 K of samples **2** (a), **2** annealed at 110°C (b) and **1** (c).

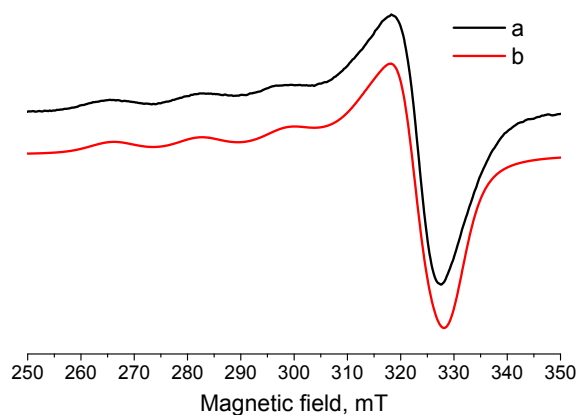

**Fig. S3.** X-band EPR spectra of polycrystalline **3** at 300 K: a-experimental; b-simulated.

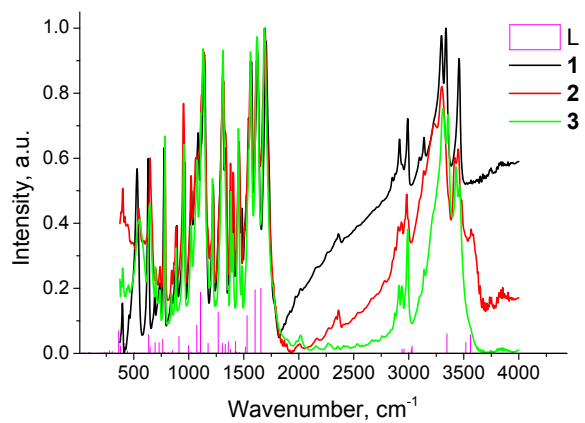

**Fig. S4.** Experimental IR-spectra of polycrystalline samples **1** (in KBr), **2** (in oil), and **3** (in oil) at 300K and calculated by ADF IR-spectrum of L. Line at  $3460\text{ cm}^{-1}$  (sample **1**) corresponds to  $\text{KBr}(\text{H}_2\text{O})$ .
